# Supplementary material
Source: PubMed Central journal article supplement (PMC4186667)
Supplement: ic501462y_si_001.pdf [file ic501462y_si_001.pdf]

Supporting Information for:

## Study of Iron Dimers Reveals Angular Dependence of Valence-to-Core X-ray Emission Spectra

Christopher J. Pollock,<sup>a</sup> Kyle M. Lancaster,<sup>b</sup> Kenneth D. Finkelstein,<sup>c</sup> Serena DeBeer<sup>a,b\*</sup>

<sup>a</sup> Max-Planck-Institut für Chemische Energiekonversion, Stiftstrasse 34-36, D-45470 Mülheim an der Ruhr, Germany

<sup>b</sup> Department of Chemistry and Chemical Biology, Cornell University, Ithaca, New York 14853, United States

<sup>c</sup> Cornell High Energy Synchrotron Source, Wilson Laboratory, Cornell University, Ithaca, NY 14853, United States

*KEYWORDS* x-ray emission spectroscopy, valence-to-core, dimers, bond angle

serena.debeer@cec.mpg.de

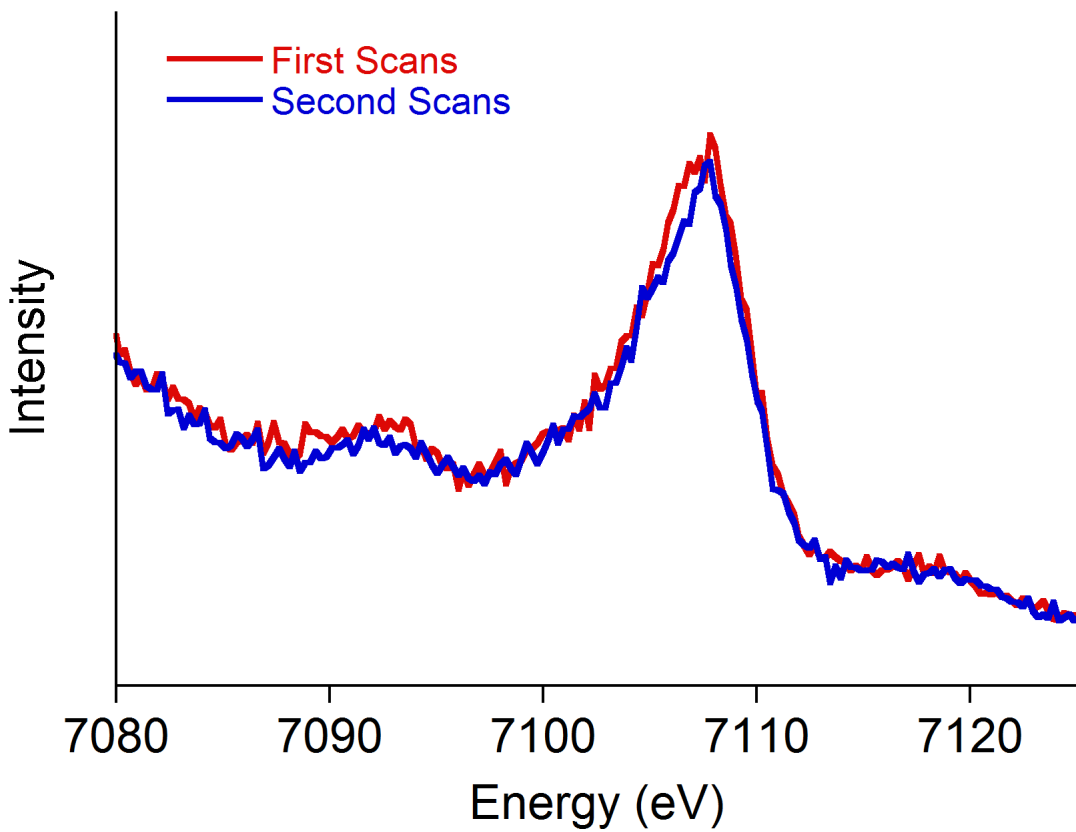

**Figure S1:** An overlay of the first and second scans for **8** shows evidence of slight damage.

## Broadening Modulation Using Matlab

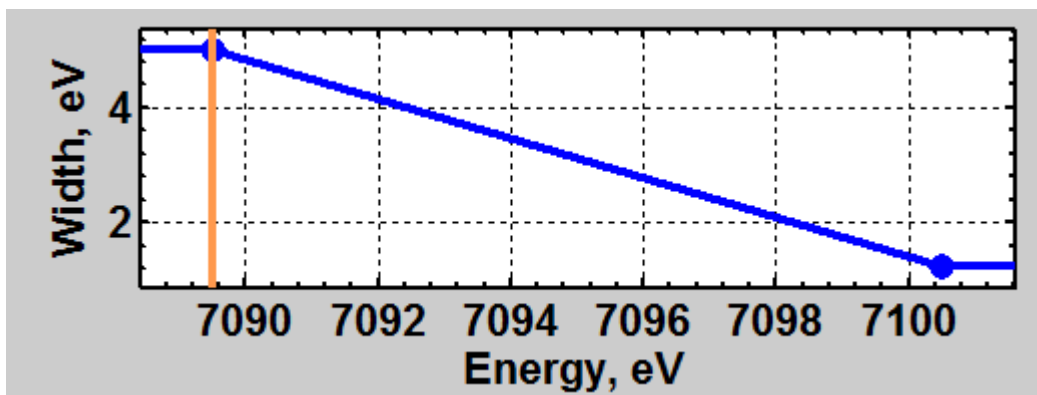

**Figure S2:** The broadening applied to these calculated spectra was modulated to account for the greater HWHM values observed for the  $K\beta''$  peaks relative to the  $K\beta_{2.5}$ . Namely, an initial HWHM broadening of 5 eV was applied below 7089.5 eV. Then, between 7089.5 and 7100.5 eV, this broadening linearly decreased to 1.25 eV, which was kept constant above 7100.5 eV. A 50:50 mixing of Gaussian / Lorentzian was used for the entire VtC spectrum.

### Contributions to $K\beta''$

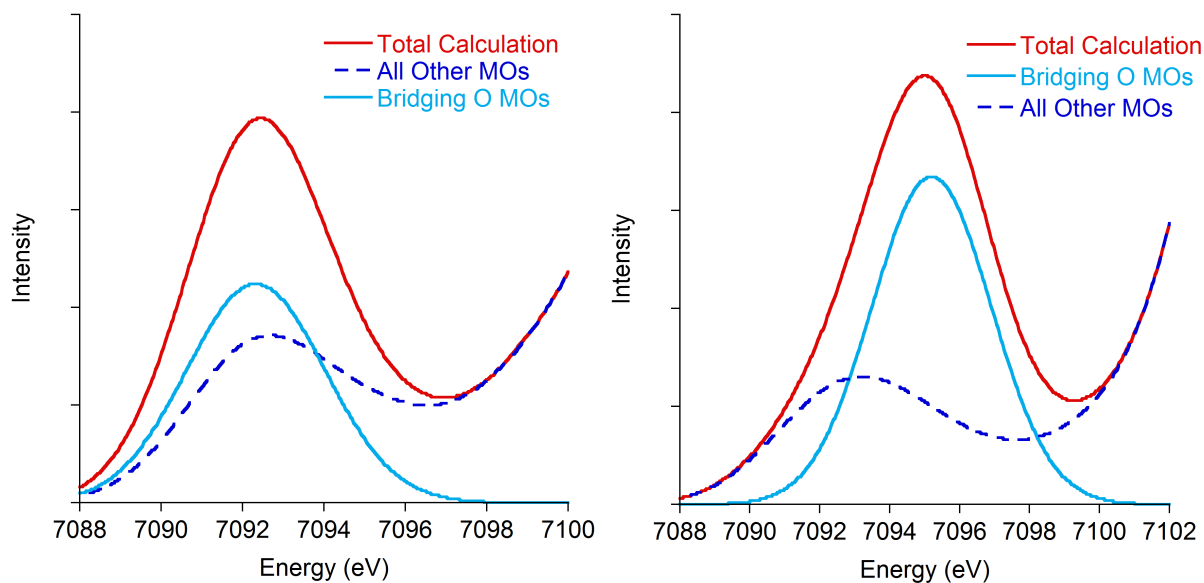

**Figure S3:** Plots showing the contributions of the bridging oxo and supporting ligands to the  $K\beta''$  feature for compounds **1** and **6**. As can clearly be seen, the 2s orbital from the bridging oxo constitutes the dominant contribution to the  $K\beta''$  intensity, even in cases where the  $\text{Fe-O}_{\text{bridging}}$  bond length is relatively long (**1**). This can be attributed to the fact that the MOs from the supporting ligands are delocalized away from the metal centers and thus have less Fe  $np$  mixing.

## Sample ORCA Geometry Optimization Input File

```
! UKS BP86 def2-TZVP def2-TZV/J TightSCF SlowConv SCFConv7 COSMO
! Grid4 NoFinalGrid Normalprint
! OPT
! PAL8
```

```
%geom Constraints
  {C 0 C}
  {C 1 C}
  {C 2 C}
end
```

```
end
```

```
%scf
  MaxIter 500
end
```

```
%maxcore 1024
```

```
%basis newgto Fe "CP(PPP)" end
  end
```

```
%method SpecialGridAtoms 26
  SpecialGridIntAcc 7
end
```

```
* xyzfile 4 11 FeTACN_bent.xyz
```

## Sample ORCA Broken Symmetry Calculation Input File

```
! UKS BP86 def2-TZVP def2-TZV/J TightSCF SlowConv SCFConv7 COSMO
! Grid4 NoFinalGrid Normalprint
! PAL4
! MOREAD

%moinp"HEDTA_opt.gbvw"

%scf BrokenSym 5,5
    MaxIter 500
    end

%maxcore 1024

%basis newgto Fe "CP(PPP)" end
    end

%method SpecialGridAtoms 26
    SpecialGridIntAcc 7
    end

%xes CoreOrb 0,1
    OrbOp 0,1
    end

* xyzfile -2 11 HEDTA_opt.xyz
```

## Sample ORCA XES Calculation Input File

```
! UKS BP86 def2-TZVP def2-TZV/J TightSCF SlowConv SCFConv7 COSMO
! Grid4 NoFinalGrid Normalprint
! PAL8
! MOREAD NOITER

%moinp"FeTACN_bentOpt.gbwn"

%maxcore 1024

%basis newgto Fe "CP(PPP)" end
      end

%method SpecialGridAtoms 26
      SpecialGridIntAcc 7
      end

%xes CoreOrb 0,0
      OrbOp 0,1
      end

* xyzfile 4 11 FeTACN_bentOpt.xyz
```

## ORCA Input Keywords

|                        |                                                                                                                                                                                                                                   |
|------------------------|-----------------------------------------------------------------------------------------------------------------------------------------------------------------------------------------------------------------------------------|
| UKS                    | Defines that the calculation will use the unrestricted Kohn-Sham method, allowing unpaired electrons. The spin-restricted analog is invoked with “RKS”.                                                                           |
| BP86                   | Selects the BP86 functional                                                                                                                                                                                                       |
| def2-TZVP              | Selects the def2-TZVP basis set                                                                                                                                                                                                   |
| def2-TZV/J             | Selects the def2-TZV/J auxiliary basis set                                                                                                                                                                                        |
| TightSCF               | Defines the criteria for SCF convergence                                                                                                                                                                                          |
| SlowConv               | Specifies the strategy to be used to achieve SCF convergence. This keyword is often used for calculations on transition metal complexes.                                                                                          |
| SCFConv7               | Further specifies SCF convergence criteria                                                                                                                                                                                        |
| COSMO                  | Models the presence of solvent using the conductor-like screening model. A specific solvent may be chosen (e.g. COSMO(THF) for tetrahydrofuran) or, in the absence of this specification, an infinite dielectric is used.         |
| Grid4, NoFinalGrid     | Selects the integration grid to be used                                                                                                                                                                                           |
| OPT                    | Specifies a geometry optimization                                                                                                                                                                                                 |
| PAL8                   | Specifies that eight processors should be used for the calculation                                                                                                                                                                |
| MOREAD                 | Dictates that previously generated orbitals should be used as a starting point for the calculation. If used with “NOITER”, no additional SCF iterations will be performed and the orbitals will be used exactly as they are read. |
| * xyzfile A B file.xyz | Dictates that the atomic coordinates for the calculation are found in “file.xyz”. “A” is equal to the charge on the molecule and “B” is the multiplicity.                                                                         |
| * xyz A B              | Same as above, except the atomic coordinates are contained within the input file rather than a separate xyz file                                                                                                                  |
| %scf                   | This block contains the controls for parameters governing the SCF iterations                                                                                                                                                      |
| MaxIter                | Specifies the maximum number of SCF iterations that can be carried out                                                                                                                                                            |
| %maxcore               | Defines how much scratch memory is available for the calculation                                                                                                                                                                  |
| %method                | This block contains controls for a variety of parameters governing the computational model                                                                                                                                        |
| SpecialGridAtoms       | Defines that atoms with atomic number 26 (Fe) should have a special integration grid distinct from the general calculation                                                                                                        |



|                   |                                                                                                                                                                                                                                                                                                                                                                                                                                 |
|-------------------|---------------------------------------------------------------------------------------------------------------------------------------------------------------------------------------------------------------------------------------------------------------------------------------------------------------------------------------------------------------------------------------------------------------------------------|
| SpecialGridIntAcc | Dictates that an integration accuracy of 7 should be used for the atoms defined in SpecialGridAtoms. This is often necessary when calculating core properties and x-ray spectra.                                                                                                                                                                                                                                                |
| %moinp            | Used with MOREAD, this command specifies the orbitals that should be read as the starting point                                                                                                                                                                                                                                                                                                                                 |
| %basis            | This block contains variables that control the basis set                                                                                                                                                                                                                                                                                                                                                                        |
| newgto            | Dictates that additional basis functions should be added to the indicated element. In this cases, the large core properties CP(PPP) basis is being used for Fe.                                                                                                                                                                                                                                                                 |
| %xes              | This block controls the calculation of XES spectra                                                                                                                                                                                                                                                                                                                                                                              |
| CoreOrb           | Dictates the orbitals that will be the electron acceptors. For transition metal XES spectra, the metal 1s orbital is <i>usually</i> orbital 0.                                                                                                                                                                                                                                                                                  |
| OrbOp             | Defines the operators of the electrons ( $\alpha = 0$ , $\beta = 1$ ) that will be calculated                                                                                                                                                                                                                                                                                                                                   |
| BrokenSym 5,5     | Defines the desired spin coupling scheme with the number of unpaired electrons on each center specified (5,5). In this calculation, an antiferromagnetically coupled iron dimer is investigated, with five unpaired electrons on each iron, so the “5,5” formalism is used. Importantly, the two iron centers must be the first two atoms in the xyz file. The “spinflip” command could also be used to give identical results. |

### Optimized xyz Coordinates for 1:

|    |           |           |           |
|----|-----------|-----------|-----------|
| Fe | 0.041135  | 0.101120  | -1.728409 |
| Fe | -0.192089 | 0.177126  | 1.902223  |
| C  | -0.020163 | -2.778053 | -2.502542 |
| C  | 2.128441  | 2.186562  | -2.422443 |
| C  | -2.250018 | 2.194664  | 2.818065  |
| C  | 0.226577  | -2.641145 | 2.810552  |
| C  | 0.674963  | -4.016727 | -2.480265 |
| C  | 3.511520  | 2.466445  | -2.579892 |
| C  | -3.599966 | 2.415281  | 3.199172  |
| C  | -0.366820 | -3.916361 | 3.008233  |
| C  | 0.002515  | -5.222738 | -2.616706 |
| C  | 3.956421  | 3.739726  | -2.912158 |
| C  | -4.083641 | 3.696261  | 3.432521  |
| C  | 0.407640  | -5.064264 | 3.101106  |
| C  | -1.395216 | -5.259792 | -2.796840 |
| C  | 3.047556  | 4.797748  | -3.106262 |
| C  | -3.247116 | 4.821778  | 3.302449  |
| C  | 1.813161  | -5.001665 | 3.016565  |
| C  | -2.096853 | -4.065452 | -2.842707 |
| C  | 1.690380  | 4.550987  | -2.959446 |
| C  | -1.922725 | 4.633813  | 2.934812  |
| C  | 2.419868  | -3.767565 | 2.844170  |
| C  | -1.446008 | -2.815876 | -2.695352 |
| C  | 1.201634  | 3.267317  | -2.619605 |
| C  | -1.397125 | 3.344072  | 2.684048  |
| C  | 1.661727  | -2.576299 | 2.734243  |
| C  | -2.239826 | -1.623118 | -2.825370 |
| C  | -0.224340 | 3.098595  | -2.497385 |
| C  | -0.007588 | 3.241964  | 2.315407  |
| C  | 2.374273  | -1.331851 | 2.624690  |
| C  | -2.706959 | 0.713570  | -2.960580 |
| C  | -2.275603 | 1.921170  | -2.123833 |
| C  | 2.027037  | 2.140258  | 1.689358  |
| C  | 2.690488  | 1.030438  | 2.508722  |
| H  | 1.757104  | -3.991444 | -2.340597 |
| H  | 3.405070  | 5.794013  | -3.367721 |
| H  | 0.966320  | 5.356465  | -3.106652 |
| H  | -0.836780 | 3.993709  | -2.696475 |
| H  | -2.566561 | 1.762543  | -1.073004 |
| H  | -2.753234 | 2.844902  | -2.487503 |
| H  | -4.249751 | 1.544265  | 3.302922  |
| H  | -5.128444 | 3.828107  | 3.722168  |
| H  | -3.634155 | 5.823849  | 3.488900  |
| H  | -1.254723 | 5.492585  | 2.830146  |
| H  | 0.556611  | 4.188898  | 2.288205  |
| H  | 0.568309  | -6.156503 | -2.584505 |
| H  | 2.121137  | 1.909169  | 0.615411  |
| H  | 2.501480  | 3.114863  | 1.885456  |
| H  | -1.455159 | -3.967844 | 3.076033  |
| H  | -0.083120 | -6.029637 | 3.243755  |
| H  | 2.412763  | -5.909047 | 3.093987  |
| H  | 3.509143  | -3.692993 | 2.791657  |
| H  | 3.470906  | -1.399476 | 2.715975  |
| H  | 2.766691  | 1.355958  | 3.559603  |

|   |           |           |           |
|---|-----------|-----------|-----------|
| H | 3.707302  | 0.817640  | 2.142418  |
| H | -1.913731 | -6.212658 | -2.906932 |
| H | -3.178931 | -4.068924 | -2.997709 |
| H | -3.292014 | -1.777403 | -3.116656 |
| H | -2.597458 | 0.960479  | -4.029839 |
| H | -3.761817 | 0.456258  | -2.774743 |
| H | 4.217930  | 1.647735  | -2.430967 |
| H | 5.028017  | 3.918415  | -3.024618 |
| N | -1.813060 | -0.408686 | -2.657655 |
| N | -0.819782 | 1.993675  | -2.182813 |
| N | 0.607527  | 2.140873  | 2.025841  |
| N | 1.836750  | -0.161352 | 2.460668  |
| O | 0.650986  | -1.656484 | -2.383494 |
| O | 1.752896  | 0.965448  | -2.110796 |
| O | -0.309959 | -0.071020 | 0.076066  |
| O | -1.834098 | 0.963444  | 2.618257  |
| O | -0.536845 | -1.575908 | 2.736865  |

## Optimized xyz Coordinates for 2:

|    |           |           |           |
|----|-----------|-----------|-----------|
| Fe | -0.100824 | 0.125839  | -1.838186 |
| Fe | 0.012189  | 0.061595  | 1.802489  |
| C  | 4.493395  | -0.149236 | -1.512652 |
| C  | 0.257175  | -2.125781 | -3.710225 |
| C  | -4.174129 | 1.964759  | 1.371780  |
| C  | -2.931797 | 1.062701  | 1.312593  |
| C  | -1.252905 | 2.832993  | 1.632296  |
| C  | 0.261704  | 2.994929  | 1.816589  |
| C  | -2.062562 | 1.539341  | 3.570958  |
| C  | -0.804800 | 1.464191  | 4.432725  |
| C  | 1.412697  | 0.350603  | 4.470165  |
| C  | 2.272060  | -0.528179 | 3.542444  |
| C  | -0.632538 | -0.983192 | 4.645261  |
| C  | 2.974994  | -0.364014 | -1.423128 |
| C  | -1.402925 | -1.800570 | 3.599179  |
| C  | 2.306625  | 1.992549  | -1.661489 |
| C  | 1.032977  | 2.840862  | -1.777875 |
| C  | 2.384045  | 0.526264  | -3.645491 |
| C  | 1.217921  | 1.067637  | -4.468597 |
| C  | -1.263979 | 1.106980  | -4.452378 |
| C  | -2.413254 | 0.690309  | -3.515247 |
| C  | -0.072598 | -1.014560 | -4.716240 |
| N  | 2.146020  | 0.614971  | -2.178433 |
| N  | -0.035627 | 0.351348  | -4.154298 |
| N  | -1.765830 | 1.530187  | 2.111938  |
| N  | -0.015328 | 0.253797  | 4.123501  |
| O  | 5.187343  | -1.155068 | -0.758765 |
| O  | -5.238881 | 1.405881  | 0.587533  |
| O  | 0.945953  | 1.897972  | 1.855423  |
| O  | 0.747324  | 4.137456  | 1.874410  |
| O  | 3.407408  | -0.871052 | 3.912556  |
| O  | 1.746847  | -0.834627 | 2.396860  |
| O  | -1.258447 | -1.453072 | 2.361520  |
| O  | -2.091364 | -2.761914 | 3.986035  |
| O  | -0.081074 | 2.185376  | -1.824579 |
| O  | -0.099164 | -0.240332 | -0.022030 |
| O  | 1.129027  | 4.079808  | -1.778964 |
| O  | -3.586087 | 0.915089  | -3.856093 |
| O  | -2.063388 | 0.144164  | -2.391481 |
| O  | 0.316210  | -1.788417 | -2.462717 |
| O  | 0.416537  | -3.283656 | -4.136680 |
| H  | -1.076947 | 2.174073  | -4.265517 |
| H  | -1.584113 | 0.998137  | -5.501527 |
| H  | -1.085920 | -1.227817 | -5.088295 |
| H  | 0.601519  | -1.107046 | -5.583316 |
| H  | 1.472663  | 0.979638  | -5.540329 |
| H  | 1.062352  | 2.134141  | -4.261652 |
| H  | 3.297781  | 1.074561  | -3.931602 |
| H  | 2.552240  | -0.532774 | -3.887362 |
| H  | 5.060207  | -2.007119 | -1.214430 |
| H  | 4.782223  | 0.811573  | -1.063919 |
| H  | 4.833816  | -0.150071 | -2.562018 |
| H  | 2.658108  | -0.325145 | -0.371092 |
| H  | 2.725231  | -1.364558 | -1.805699 |

|   |           |           |           |
|---|-----------|-----------|-----------|
| H | -5.537256 | 0.591222  | 1.031485  |
| H | -3.966375 | 2.950288  | 0.931964  |
| H | -4.502633 | 2.120602  | 2.413483  |
| H | -2.600933 | 0.958347  | 0.269388  |
| H | -3.193597 | 0.058401  | 1.676851  |
| H | -1.424055 | 2.890168  | 0.545970  |
| H | -1.772951 | 3.681165  | 2.105698  |
| H | -2.625582 | 2.445034  | 3.854189  |
| H | -2.710729 | 0.676378  | 3.779606  |
| H | -1.105040 | 1.487007  | 5.495973  |
| H | -0.166793 | 2.340381  | 4.260500  |
| H | 1.744907  | 1.387361  | 4.317364  |
| H | 1.612040  | 0.083735  | 5.520923  |
| H | 0.154296  | -1.646297 | 5.034976  |
| H | -1.303047 | -0.767042 | 5.492902  |
| H | 2.521965  | 1.931981  | -0.583443 |
| H | 3.143389  | 2.520305  | -2.146529 |

### Optimized xyz Coordinates for 3:

|    |           |           |           |
|----|-----------|-----------|-----------|
| Fe | -0.003770 | 0.180389  | -1.528702 |
| Fe | 0.003686  | -0.180697 | 1.532005  |
| O  | -0.338280 | -1.368738 | -0.157777 |
| O  | -0.073786 | 1.725744  | -2.713977 |
| O  | 0.056981  | -1.047945 | -3.039379 |
| N  | -2.121811 | 0.563616  | -1.140137 |
| N  | 2.114499  | -0.290249 | -1.243220 |
| C  | -2.700177 | -1.622006 | -0.180475 |
| C  | -1.407869 | -2.183283 | -0.248997 |
| C  | -1.261602 | -3.571908 | -0.408334 |
| C  | -2.396905 | -4.381194 | -0.497743 |
| C  | -3.681813 | -3.824960 | -0.430524 |
| C  | -3.827834 | -2.442163 | -0.271695 |
| C  | -2.787102 | -0.128722 | -0.008665 |
| C  | 2.824279  | -1.007290 | -2.063179 |
| C  | -2.840700 | 1.433703  | -1.785544 |
| C  | 2.384667  | -1.618024 | -3.290190 |
| C  | 1.010893  | -1.633977 | -3.714967 |
| C  | 0.695358  | -2.329689 | -4.913052 |
| C  | 1.681395  | -2.961113 | -5.658868 |
| C  | 3.028548  | -2.940858 | -5.246617 |
| C  | 3.361271  | -2.280818 | -4.073333 |
| C  | -2.410511 | 2.294903  | -2.855652 |
| C  | -1.036943 | 2.419200  | -3.263519 |
| C  | -0.732976 | 3.347572  | -4.295288 |
| C  | -1.729256 | 4.101621  | -4.900633 |
| C  | -3.075402 | 3.979117  | -4.502820 |
| C  | -3.397269 | 3.089740  | -3.488745 |
| H  | -0.258072 | -3.996155 | -0.459548 |
| H  | -2.277938 | -5.459606 | -0.621126 |
| H  | -4.563065 | -4.463891 | -0.501129 |
| H  | -4.824240 | -1.996447 | -0.217718 |
| H  | -0.348246 | -2.349593 | -5.231751 |
| H  | 1.404514  | -3.482327 | -6.577769 |
| H  | 3.795680  | -3.441581 | -5.837542 |
| H  | 4.398441  | -2.262643 | -3.729432 |
| H  | 0.309891  | 3.447177  | -4.601201 |
| H  | -1.461237 | 4.801188  | -5.695273 |
| H  | -3.850529 | 4.577771  | -4.981573 |
| H  | -4.433926 | 2.986184  | -3.158614 |
| H  | 3.879981  | -1.197593 | -1.808382 |
| H  | -3.897222 | 1.554484  | -1.494527 |
| H  | -3.847976 | 0.179958  | 0.029521  |
| O  | 0.338009  | 1.367698  | 0.160983  |
| C  | 2.786891  | 0.128646  | 0.011359  |
| N  | -2.114592 | 0.291242  | 1.245540  |
| C  | 1.407430  | 2.182660  | 0.252654  |
| O  | 0.073963  | -1.725934 | 2.717582  |
| O  | -0.057347 | 1.047310  | 3.042579  |
| N  | 2.121662  | -0.564744 | 1.142080  |
| C  | 2.699804  | 1.621708  | 0.184162  |
| H  | 3.847806  | -0.179882 | -0.027008 |
| C  | -2.823529 | 1.011601  | 2.063373  |
| C  | 1.260844  | 3.571152  | 0.412316  |

|   |           |           |          |
|---|-----------|-----------|----------|
| C | 1.036811  | -2.422683 | 3.263553 |
| C | -1.010479 | 1.637127  | 3.715924 |
| C | 2.840125  | -1.436737 | 1.785266 |
| C | 3.827335  | 2.442005  | 0.275857 |
| C | -2.383797 | 1.623906  | 3.289558 |
| H | -3.878629 | 1.203555  | 1.807358 |
| C | 2.395965  | 4.380609  | 0.502305 |
| H | 0.257220  | 3.995069  | 0.463630 |
| C | 2.409901  | -2.299847 | 2.853792 |
| C | 0.732844  | -3.352992 | 4.293583 |
| C | -0.694549 | 2.334061  | 4.913204 |
| H | 3.896337  | -1.557962 | 1.493394 |
| C | 3.680978  | 3.824685  | 0.435171 |
| H | 4.823849  | 1.996478  | 0.221835 |
| C | -3.359624 | 2.290638  | 4.070308 |
| H | 2.276831  | 5.458966  | 0.626036 |
| C | 3.396258  | -3.097862 | 3.483520 |
| C | 1.728705  | -4.110294 | 4.895536 |
| H | -0.309725 | -3.451502 | 4.600882 |
| C | -1.679855 | 2.969344  | 5.656694 |
| H | 0.348713  | 2.351780  | 5.233140 |
| H | 4.562089  | 4.463760  | 0.506206 |
| C | -3.026540 | 2.951940  | 5.242776 |
| H | -4.396462 | 2.274594  | 3.725276 |
| C | 3.074415  | -3.989219 | 4.495863 |
| H | 4.432606  | -2.995187 | 3.152132 |
| H | 1.460691  | -4.811321 | 5.688889 |
| H | -1.402762 | 3.491390  | 6.575059 |
| H | -3.793052 | 3.455797  | 5.831843 |
| H | 3.849231  | -4.590456 | 4.971879 |

### Optimized xyz Coordinates for 4:

|    |           |           |           |
|----|-----------|-----------|-----------|
| Fe | -0.253107 | -0.014684 | 1.268758  |
| Fe | -0.253051 | 0.015776  | -1.269701 |
| O  | 0.518196  | -1.426352 | -0.018335 |
| O  | -1.805476 | -0.001332 | -0.000558 |
| O  | 0.518976  | 1.425657  | 0.017022  |
| N  | 1.434881  | 0.023680  | 2.785420  |
| N  | -1.142058 | 1.365756  | 2.794713  |
| N  | -1.017020 | -1.528618 | 2.737785  |
| C  | 1.302188  | 1.390481  | 3.360920  |
| C  | -0.118332 | 1.679359  | 3.839410  |
| C  | -2.273541 | 0.560648  | 3.329754  |
| C  | -1.828605 | -0.829379 | 3.781868  |
| C  | 0.233591  | -2.119581 | 3.284829  |
| C  | 1.194308  | -1.051681 | 3.799571  |
| C  | 2.771677  | -0.140555 | 2.175593  |
| C  | -1.645819 | 2.608098  | 2.167457  |
| C  | -1.815559 | -2.572879 | 2.057555  |
| N  | 1.434580  | -0.022407 | -2.786558 |
| C  | 1.301740  | -1.389295 | -3.361733 |
| C  | -0.118920 | -1.678639 | -3.839728 |
| N  | -1.142578 | -1.364548 | -2.795290 |
| N  | -1.017548 | 1.529834  | -2.738915 |
| C  | -1.828452 | 0.830364  | -3.783394 |
| C  | -2.273814 | -0.559160 | -3.330663 |
| C  | -1.647001 | -2.606176 | -2.167046 |
| C  | 0.233301  | 2.120593  | -3.285387 |
| C  | 1.193870  | 1.052914  | -3.800574 |
| C  | 2.771683  | 0.141927  | -2.177266 |
| C  | -1.816195 | 2.574388  | -2.059501 |
| H  | -1.233477 | 2.985024  | -1.226428 |
| H  | -2.735423 | 2.129302  | -1.661185 |
| H  | -2.083422 | 3.383481  | -2.761234 |
| H  | -1.242187 | 0.763644  | -4.708167 |
| H  | -2.720045 | 1.426208  | -4.029758 |
| H  | 0.698987  | 2.685624  | -2.465115 |
| H  | 0.010262  | 2.835188  | -4.098350 |
| H  | 0.808385  | 0.598017  | -4.721172 |
| H  | 2.145776  | 1.532111  | -4.074041 |
| H  | -0.186531 | -2.738863 | -4.126163 |
| H  | -0.344393 | -1.104211 | -4.746714 |
| H  | -3.014143 | -0.474075 | -2.522429 |
| H  | -2.764130 | -1.079029 | -4.173514 |
| H  | -2.336578 | -2.347462 | -1.354957 |
| H  | -0.804461 | -3.164617 | -1.743022 |
| H  | -2.170873 | -3.236464 | -2.906341 |
| H  | 1.583423  | -2.097947 | -2.569555 |
| H  | 2.005659  | -1.533640 | -4.201280 |
| H  | 2.913698  | -0.596546 | -1.378281 |
| H  | 2.863519  | 1.150162  | -1.754462 |
| H  | 3.569827  | 0.003937  | -2.927151 |
| H  | -2.337007 | 2.350856  | 1.356310  |
| H  | -0.803255 | 3.165616  | 1.742321  |
| H  | -2.168037 | 3.238806  | 2.907565  |
| H  | -1.231365 | -2.984911 | 1.226176  |



|   |           |           |           |
|---|-----------|-----------|-----------|
| H | -2.733119 | -2.126549 | 1.656397  |
| H | -2.085333 | -3.381114 | 2.759542  |
| H | 2.913663  | 0.598298  | 1.377305  |
| H | 2.863098  | -1.148478 | 1.752197  |
| H | 3.569844  | -0.003590 | 2.925301  |
| H | 0.699188  | -2.685185 | 2.464966  |
| H | 0.010250  | -2.833506 | 4.098247  |
| H | 0.808792  | -0.596590 | 4.720026  |
| H | 2.146299  | -1.530790 | 4.073000  |
| H | -0.343619 | 1.104105  | 4.745889  |
| H | -0.186218 | 2.739352  | 4.126615  |
| H | 1.583626  | 2.099364  | 2.568989  |
| H | 2.006238  | 1.534514  | 4.200306  |
| H | -3.014103 | 0.475923  | 2.521719  |
| H | -2.763670 | 1.080154  | 4.172910  |
| H | -1.243163 | -0.763439 | 4.707318  |
| H | -2.720518 | -1.425180 | 4.027272  |
| H | 1.463791  | -1.650103 | -0.018077 |
| H | -2.774733 | 0.018603  | -0.000636 |
| H | 1.463365  | 1.654508  | 0.017050  |

### Optimized xyz Coordinates for 5:

|    |           |           |           |
|----|-----------|-----------|-----------|
| Fe | 0.027562  | 0.002271  | 1.608074  |
| Fe | -0.000158 | 0.003628  | -1.600324 |
| N  | -0.020888 | -1.014277 | 3.697741  |
| N  | 1.467669  | 1.293844  | 2.805249  |
| N  | -1.417325 | 1.324279  | 2.747977  |
| N  | -1.495990 | 1.234704  | -2.793188 |
| N  | 1.385479  | 1.392878  | -2.732992 |
| N  | 0.094307  | -1.000251 | -3.695093 |
| O  | -0.007260 | 0.967561  | 0.004643  |
| O  | -1.455750 | -1.362921 | 1.127122  |
| O  | -1.512983 | -1.319751 | -1.128473 |
| O  | 1.598398  | -1.251309 | 1.132597  |
| O  | 1.540677  | -1.297087 | -1.122914 |
| C  | 1.015615  | -0.396780 | 4.582916  |
| C  | 2.075369  | 0.356976  | 3.788479  |
| C  | 0.710335  | 2.405869  | 3.463375  |
| C  | -0.662145 | 2.604634  | 2.833886  |
| C  | -1.737862 | 0.751072  | 4.093213  |
| C  | -1.400570 | -0.733542 | 4.175134  |
| C  | 0.188653  | -2.476265 | 3.601103  |
| C  | 2.514844  | 1.845246  | 1.916775  |
| C  | -2.655624 | 1.521308  | 1.961740  |
| C  | -0.787995 | 2.382765  | -3.444457 |
| C  | 0.574036  | 2.638785  | -2.812735 |
| C  | 1.731333  | 0.840904  | -4.080731 |
| C  | 1.460773  | -0.656912 | -4.169273 |
| C  | -0.967330 | -0.424870 | -4.578825 |
| C  | -2.060326 | 0.277034  | -3.782062 |
| C  | -2.567710 | 1.734198  | -1.903302 |
| C  | 2.613774  | 1.640614  | -1.945583 |
| C  | -0.051498 | -2.470394 | -3.604617 |
| C  | -1.924480 | -1.740974 | 0.003535  |
| C  | -3.031131 | -2.817310 | 0.001627  |
| C  | -2.315522 | -4.172848 | -0.219790 |
| C  | -4.023851 | -2.564881 | -1.147352 |
| C  | -3.781925 | -2.845454 | 1.342165  |
| C  | 2.023286  | -1.658185 | 0.000461  |
| C  | 3.166094  | -2.696023 | 0.000584  |
| C  | 2.493485  | -4.077516 | 0.195752  |
| C  | 4.138325  | -2.427524 | 1.163110  |
| C  | 3.930525  | -2.680569 | -1.332610 |
| H  | 1.507389  | -1.175426 | 5.184799  |
| H  | 0.523382  | 0.272528  | 5.299088  |
| H  | 2.692627  | -0.346091 | 3.213619  |
| H  | 2.740038  | 0.900349  | 4.483032  |
| H  | 1.280613  | 3.342996  | 3.385912  |
| H  | 0.619875  | 2.191179  | 4.534812  |
| H  | -1.230004 | 3.354816  | 3.411829  |
| H  | -0.557824 | 2.978463  | 1.805655  |
| H  | -1.195785 | 1.315361  | 4.861374  |
| H  | -2.807089 | 0.889432  | 4.311012  |
| H  | -2.080653 | -1.312770 | 3.536761  |
| H  | -1.535449 | -1.082206 | 5.214741  |
| H  | 1.203584  | -2.673790 | 3.239254  |

|   |           |           |           |
|---|-----------|-----------|-----------|
| H | -0.529069 | -2.899730 | 2.889331  |
| H | 0.053226  | -2.955628 | 4.585836  |
| H | 2.051754  | 2.528978  | 1.196680  |
| H | 3.005118  | 1.027656  | 1.376031  |
| H | 3.271314  | 2.394300  | 2.502467  |
| H | -2.390887 | 1.868706  | 0.957619  |
| H | -3.309342 | 2.265401  | 2.446897  |
| H | -3.194163 | 0.569962  | 1.883262  |
| H | -1.399145 | 3.293350  | -3.362257 |
| H | -0.687502 | 2.178153  | -4.516954 |
| H | 0.452558  | 3.002028  | -1.782610 |
| H | 1.108291  | 3.416528  | -3.386291 |
| H | 1.164235  | 1.383689  | -4.846241 |
| H | 2.793214  | 1.028149  | -4.297870 |
| H | 2.165121  | -1.208031 | -3.532260 |
| H | 1.612487  | -0.994871 | -5.210084 |
| H | -0.504588 | 0.269232  | -5.291121 |
| H | -1.423360 | -1.221508 | -5.185295 |
| H | -2.646550 | -0.455762 | -3.211844 |
| H | -2.747708 | 0.793913  | -4.474733 |
| H | -2.136140 | 2.433446  | -1.178568 |
| H | -3.022145 | 0.892624  | -1.368076 |
| H | -3.346896 | 2.252795  | -2.486941 |
| H | 3.194140  | 0.713743  | -1.872813 |
| H | 2.334018  | 1.969974  | -0.939506 |
| H | 3.233690  | 2.415759  | -2.426461 |
| H | -1.057321 | -2.713388 | -3.244907 |
| H | 0.683195  | -2.864949 | -2.893515 |
| H | 0.105750  | -2.939500 | -4.591032 |
| H | -4.278277 | -1.885734 | 1.546584  |
| H | -3.108898 | -3.072034 | 2.178969  |
| H | -4.556602 | -3.625262 | 1.307684  |
| H | -3.523213 | -2.581122 | -2.123614 |
| H | -4.532589 | -1.596356 | -1.033076 |
| H | -4.792081 | -3.351732 | -1.143027 |
| H | -1.601484 | -4.385913 | 0.588592  |
| H | -1.777221 | -4.188724 | -1.177379 |
| H | -3.064640 | -4.978118 | -0.233363 |
| H | 1.794718  | -4.302294 | -0.622692 |
| H | 1.946772  | -4.125009 | 1.147556  |
| H | 3.268594  | -4.857849 | 0.205745  |
| H | 3.629035  | -2.474107 | 2.133900  |
| H | 4.615998  | -1.441277 | 1.068012  |
| H | 4.932025  | -3.188647 | 1.155802  |
| H | 4.395772  | -1.701858 | -1.519739 |
| H | 3.273805  | -2.918587 | -2.179074 |
| H | 4.731176  | -3.433758 | -1.300546 |

## Optimized xyz Coordinates for 6:

|    |           |           |           |
|----|-----------|-----------|-----------|
| Fe | 0.125923  | -0.073705 | 1.553563  |
| Fe | 0.115624  | -0.157154 | -1.523974 |
| O  | 1.176493  | -0.173189 | 0.013127  |
| O  | -0.932614 | 1.629799  | 1.099030  |
| O  | -1.137594 | -1.719387 | -1.061680 |
| O  | 2.951509  | 4.781367  | -4.310487 |
| O  | 2.865441  | -4.313054 | -5.387573 |
| O  | 2.406614  | -5.188036 | 4.497255  |
| O  | 3.445241  | 3.789341  | 5.305099  |
| N  | -1.410485 | 1.260508  | -1.111654 |
| N  | -0.885817 | -0.005217 | -3.586319 |
| N  | 1.185718  | 1.492563  | -2.520706 |
| N  | 1.162151  | -1.551830 | -2.836904 |
| N  | -1.560060 | -1.295042 | 1.150241  |
| N  | -0.888244 | -0.092079 | 3.623150  |
| N  | 1.011161  | -1.802844 | 2.564452  |
| N  | 1.330693  | 1.212355  | 2.862696  |
| C  | -0.155363 | 0.928033  | -4.479932 |
| H  | -0.876230 | 1.532877  | -5.054086 |
| H  | 0.400449  | 0.337330  | -5.226157 |
| C  | 0.834482  | 1.828901  | -3.772601 |
| C  | 1.397087  | 2.933749  | -4.439388 |
| C  | 1.040066  | 3.246571  | -5.867564 |
| H  | 1.747862  | 3.964746  | -6.296494 |
| H  | 0.027285  | 3.671845  | -5.949838 |
| H  | 1.061225  | 2.338694  | -6.487034 |
| C  | 2.333586  | 3.701760  | -3.724007 |
| C  | 2.154130  | 5.990617  | -4.364941 |
| H  | 2.771613  | 6.736047  | -4.877335 |
| H  | 1.915425  | 6.337431  | -3.348327 |
| H  | 1.222689  | 5.829686  | -4.926882 |
| C  | 2.725425  | 3.342390  | -2.418087 |
| C  | 3.760506  | 4.125226  | -1.661081 |
| H  | 3.932499  | 3.682157  | -0.672236 |
| H  | 3.450994  | 5.170937  | -1.519937 |
| H  | 4.716732  | 4.143434  | -2.203819 |
| C  | 2.110285  | 2.221641  | -1.867892 |
| H  | 2.348748  | 1.876630  | -0.859681 |
| C  | -0.867286 | -1.383734 | -4.125679 |
| H  | -1.183240 | -1.399072 | -5.179701 |
| H  | -1.594024 | -1.976697 | -3.551082 |
| C  | 0.510693  | -1.987603 | -3.939923 |
| C  | 1.079361  | -2.926579 | -4.806651 |
| C  | 0.377186  | -3.457868 | -6.026738 |
| H  | -0.528289 | -2.890557 | -6.265068 |
| H  | 0.083241  | -4.508584 | -5.877821 |
| H  | 1.046205  | -3.436755 | -6.897493 |
| C  | 2.387094  | -3.394302 | -4.508947 |
| C  | 4.263755  | -4.321843 | -5.767864 |
| H  | 4.287060  | -4.787161 | -6.759533 |
| H  | 4.865466  | -4.917372 | -5.071046 |
| H  | 4.651745  | -3.297304 | -5.833976 |
| C  | 3.063848  | -2.956221 | -3.347651 |
| C  | 4.393641  | -3.478312 | -2.866633 |

|   |           |           |           |
|---|-----------|-----------|-----------|
| H | 4.402720  | -4.576882 | -2.833886 |
| H | 4.589178  | -3.107190 | -1.852305 |
| H | 5.231311  | -3.156989 | -3.500238 |
| C | 2.384407  | -2.026672 | -2.559204 |
| H | 2.842453  | -1.648493 | -1.642044 |
| C | -2.252201 | 0.471632  | -3.262850 |
| H | -2.783653 | -0.363710 | -2.788377 |
| H | -2.800566 | 0.757736  | -4.177476 |
| C | -2.193473 | 1.644912  | -2.290931 |
| H | -1.745326 | 2.528259  | -2.782855 |
| H | -3.226925 | 1.920295  | -2.030168 |
| C | -1.566215 | 1.932746  | 0.017940  |
| C | -2.504543 | 3.118717  | 0.111649  |
| H | -2.320300 | 3.842579  | -0.694763 |
| H | -2.374022 | 3.610729  | 1.080907  |
| H | -3.551028 | 2.789003  | 0.021606  |
| C | -0.272924 | -1.102637 | 4.520369  |
| H | -1.063499 | -1.641717 | 5.067771  |
| H | 0.316558  | -0.579190 | 5.290494  |
| C | 0.639977  | -2.089827 | 3.824767  |
| C | 1.112528  | -3.221629 | 4.505633  |
| C | 0.696828  | -3.498291 | 5.925923  |
| H | 0.801387  | -2.601753 | 6.553933  |
| H | 1.304385  | -4.298720 | 6.359718  |
| H | -0.358853 | -3.809649 | 5.977651  |
| C | 2.002742  | -4.078167 | 3.818051  |
| C | 3.802053  | -5.580525 | 4.470989  |
| H | 3.983621  | -6.076604 | 5.431349  |
| H | 4.450599  | -4.698785 | 4.385717  |
| H | 4.003030  | -6.283322 | 3.653135  |
| C | 2.365871  | -3.804307 | 2.477190  |
| C | 3.195165  | -4.722824 | 1.618397  |
| H | 2.845779  | -5.761985 | 1.696677  |
| H | 4.260396  | -4.708395 | 1.888336  |
| H | 3.113692  | -4.419152 | 0.567041  |
| C | 1.839524  | -2.642044 | 1.918597  |
| H | 2.069020  | -2.364623 | 0.887519  |
| C | -0.704973 | 1.275775  | 4.155729  |
| H | -1.005826 | 1.337381  | 5.213522  |
| H | -1.361850 | 1.949540  | 3.585626  |
| C | 0.729143  | 1.719292  | 3.958039  |
| C | 1.386298  | 2.609654  | 4.825059  |
| C | 0.728376  | 3.144449  | 6.068981  |
| H | 1.478756  | 3.542912  | 6.761414  |
| H | 0.168280  | 2.357280  | 6.591851  |
| H | 0.014047  | 3.949317  | 5.836875  |
| C | 2.712692  | 2.957850  | 4.493061  |
| C | 3.135232  | 5.201093  | 5.189598  |
| H | 3.777440  | 5.710022  | 5.916162  |
| H | 2.079662  | 5.400304  | 5.423122  |
| H | 3.362038  | 5.558506  | 4.174088  |
| C | 3.359562  | 2.398740  | 3.373600  |
| C | 4.791111  | 2.715032  | 3.046120  |
| H | 5.107344  | 2.183623  | 2.139593  |
| H | 5.457031  | 2.419928  | 3.870173  |
| H | 4.938351  | 3.793022  | 2.886965  |
| C | 2.606602  | 1.528936  | 2.587730  |

|   |           |           |           |
|---|-----------|-----------|-----------|
| H | 3.033964  | 1.061885  | 1.697520  |
| C | -2.301120 | -0.405933 | 3.300462  |
| H | -2.731083 | 0.484341  | 2.823190  |
| H | -2.879646 | -0.623239 | 4.215436  |
| C | -2.379427 | -1.581662 | 2.333111  |
| H | -2.033649 | -2.508310 | 2.827861  |
| H | -3.438187 | -1.738060 | 2.075656  |
| C | -1.799944 | -1.943478 | 0.021792  |
| C | -2.875152 | -3.007012 | -0.068500 |
| H | -2.807499 | -3.512394 | -1.037287 |
| H | -3.873615 | -2.552370 | 0.022856  |
| H | -2.778059 | -3.746786 | 0.738645  |

## Optimized xyz Coordinates for 7:

|    |           |           |           |
|----|-----------|-----------|-----------|
| Fe | 1.507808  | -0.031629 | -0.176865 |
| Fe | -1.388199 | 0.001828  | 0.082782  |
| O  | 0.066260  | -1.207861 | -0.091336 |
| O  | 0.003512  | 1.419937  | -0.046846 |
| O  | 2.616703  | 0.749882  | -6.328459 |
| N  | 3.215608  | 1.460621  | -0.365339 |
| C  | 2.925078  | 2.253630  | -1.585294 |
| H  | 3.787491  | 2.874942  | -1.868861 |
| H  | 2.095824  | 2.940002  | -1.354624 |
| N  | 1.784055  | 0.260406  | -2.312488 |
| C  | 2.502389  | 1.333720  | -2.707556 |
| N  | 2.175520  | 0.336676  | 1.867913  |
| C  | 2.809361  | 1.572111  | -4.057383 |
| N  | 3.186331  | -1.344967 | -0.246005 |
| C  | 2.324113  | 0.633164  | -4.995135 |
| C  | 1.609666  | -0.509998 | -4.583831 |
| C  | 1.363651  | -0.638822 | -3.219145 |
| H  | 0.806990  | -1.492783 | -2.828251 |
| C  | 3.656271  | 2.738740  | -4.490260 |
| H  | 4.493888  | 2.899901  | -3.798507 |
| H  | 3.077318  | 3.674506  | -4.520016 |
| H  | 4.074017  | 2.562476  | -5.488052 |
| C  | 1.904979  | 1.785221  | -7.053226 |
| H  | 2.341074  | 1.802153  | -8.057357 |
| H  | 2.026662  | 2.768754  | -6.579226 |
| H  | 0.836109  | 1.532848  | -7.116337 |
| C  | 1.147708  | -1.548503 | -5.565111 |
| H  | 0.569611  | -2.331180 | -5.058519 |
| H  | 2.005736  | -2.021337 | -6.065463 |
| H  | 0.523986  | -1.107104 | -6.355231 |
| C  | 3.187354  | 2.287578  | 0.865126  |
| H  | 2.360139  | 3.008715  | 0.773731  |
| H  | 4.110843  | 2.878702  | 0.964757  |
| C  | 2.960815  | 1.413495  | 2.077855  |
| C  | 3.509402  | 1.704647  | 3.335904  |
| C  | 2.438552  | -0.347805 | 4.162008  |
| C  | 4.342751  | 2.936802  | 3.565663  |
| H  | 3.781136  | 3.847486  | 3.311533  |
| H  | 5.250298  | 2.927747  | 2.943016  |
| H  | 4.647829  | 3.004703  | 4.614659  |
| C  | 4.852436  | 0.261072  | 6.075919  |
| H  | 5.065619  | 0.589522  | 7.098373  |
| H  | 5.726373  | 0.441670  | 5.432940  |
| H  | 4.605119  | -0.809107 | 6.073915  |
| C  | 2.103819  | -1.328049 | 5.249975  |
| H  | 1.183156  | -1.873274 | 5.006013  |
| H  | 1.976861  | -0.819875 | 6.215228  |
| H  | 2.900147  | -2.077650 | 5.375049  |
| C  | 4.502476  | 0.712287  | -0.496784 |
| H  | 5.228835  | 1.111592  | 0.228631  |
| H  | 4.936901  | 0.925939  | -1.486578 |
| C  | 4.407703  | -0.791525 | -0.338882 |
| C  | 5.577020  | -1.569841 | -0.322757 |
| C  | 5.423540  | -2.965277 | -0.187356 |

|   |           |           |           |
|---|-----------|-----------|-----------|
| C | 4.140512  | -3.552783 | -0.112004 |
| C | 3.055663  | -2.681854 | -0.145573 |
| H | 2.031250  | -3.057962 | -0.102992 |
| C | 6.933157  | -0.933603 | -0.451643 |
| H | 7.025277  | -0.389313 | -1.404247 |
| H | 7.722505  | -1.690736 | -0.413336 |
| H | 7.111632  | -0.205619 | 0.354657  |
| C | 6.934208  | -4.369814 | 1.027820  |
| H | 7.804541  | -4.991920 | 0.794616  |
| H | 6.128322  | -4.996464 | 1.432905  |
| H | 7.209134  | -3.598519 | 1.762412  |
| C | 3.922962  | -5.038689 | -0.049221 |
| H | 2.923541  | -5.294409 | -0.423867 |
| H | 3.993951  | -5.415668 | 0.982645  |
| H | 4.672851  | -5.571352 | -0.649421 |
| C | 3.248311  | 0.788336  | 4.378478  |
| C | 1.920818  | -0.511672 | 2.878525  |
| H | 1.272485  | -1.358737 | 2.645172  |
| O | 3.731787  | 1.067425  | 5.628990  |
| O | 6.548243  | -3.746033 | -0.223571 |
| O | -2.741687 | -1.023809 | 6.175563  |
| N | -3.047018 | -1.482364 | 0.184519  |
| C | -2.725227 | -2.330025 | 1.361238  |
| H | -3.543824 | -3.032930 | 1.573979  |
| H | -1.834159 | -2.925358 | 1.108728  |
| N | -1.731099 | -0.324288 | 2.230676  |
| C | -2.407663 | -1.449447 | 2.546338  |
| N | -2.106002 | -0.167565 | -1.970600 |
| C | -2.769025 | -1.761350 | 3.867557  |
| N | -3.139539 | 1.328587  | 0.290882  |
| C | -2.384678 | -0.838079 | 4.866095  |
| C | -1.714075 | 0.356950  | 4.537544  |
| C | -1.407631 | 0.555158  | 3.192837  |
| H | -0.883829 | 1.458171  | 2.873362  |
| C | -3.571081 | -2.988362 | 4.209054  |
| H | -4.355548 | -3.172045 | 3.462971  |
| H | -2.940517 | -3.890019 | 4.242397  |
| H | -4.055595 | -2.872695 | 5.185334  |
| C | -2.014083 | -2.048176 | 6.900256  |
| H | -2.502855 | -2.129049 | 7.876598  |
| H | -2.054708 | -3.016678 | 6.383416  |
| H | -0.965899 | -1.741969 | 7.033477  |
| C | -1.363141 | 1.379472  | 5.579534  |
| H | -0.797374 | 2.208162  | 5.135910  |
| H | -2.272157 | 1.790899  | 6.042830  |
| H | -0.765317 | 0.940232  | 6.390485  |
| C | -2.949906 | -2.241088 | -1.089924 |
| H | -2.042797 | -2.862962 | -1.038220 |
| H | -3.810582 | -2.915776 | -1.211652 |
| C | -2.825477 | -1.275141 | -2.244269 |
| C | -3.396326 | -1.502839 | -3.504962 |
| C | -2.475790 | 0.670058  | -4.195863 |
| C | -4.161954 | -2.762959 | -3.808294 |
| H | -3.531488 | -3.652857 | -3.666446 |
| H | -5.033104 | -2.870759 | -3.144568 |
| H | -4.517890 | -2.757842 | -4.843331 |
| C | -4.908762 | 0.074689  | -6.083283 |



|   |           |           |           |
|---|-----------|-----------|-----------|
| H | -5.139411 | -0.188539 | -7.120726 |
| H | -5.751011 | -0.197443 | -5.430221 |
| H | -4.715283 | 1.153321  | -6.008280 |
| C | -2.229522 | 1.746844  | -5.214338 |
| H | -1.331356 | 2.322402  | -4.956929 |
| H | -2.107651 | 1.320269  | -6.218994 |
| H | -3.068370 | 2.458245  | -5.258880 |
| C | -4.368478 | -0.805587 | 0.331568  |
| H | -5.024933 | -1.119140 | -0.495708 |
| H | -4.861881 | -1.179161 | 1.243053  |
| C | -4.330274 | 0.709753  | 0.381484  |
| C | -5.535857 | 1.420316  | 0.516759  |
| C | -5.459309 | 2.827227  | 0.541719  |
| C | -4.213793 | 3.485940  | 0.457353  |
| C | -3.090201 | 2.672831  | 0.332510  |
| H | -2.098819 | 3.124873  | 0.270022  |
| C | -6.851865 | 0.701973  | 0.631226  |
| H | -6.870964 | 0.044354  | 1.514293  |
| H | -7.676144 | 1.415920  | 0.723825  |
| H | -7.039278 | 0.066665  | -0.247978 |
| C | -7.132661 | 4.233869  | -0.426442 |
| H | -8.014689 | 4.781943  | -0.079056 |
| H | -6.396739 | 4.938214  | -0.837994 |
| H | -7.422752 | 3.506973  | -1.199649 |
| C | -4.072117 | 4.979634  | 0.540547  |
| H | -3.057299 | 5.251890  | 0.857556  |
| H | -4.252216 | 5.457279  | -0.434850 |
| H | -4.792204 | 5.402991  | 1.253747  |
| C | -3.224914 | -0.493020 | -4.477989 |
| C | -1.931241 | 0.769335  | -2.916409 |
| H | -1.326049 | 1.633678  | -2.635393 |
| O | -3.735901 | -0.703426 | -5.731123 |
| O | -6.612762 | 3.542541  | 0.737747  |
| H | 0.023956  | 2.320591  | 0.318626  |

### Optimized xyz Coordinates for 8:

|    |           |           |           |
|----|-----------|-----------|-----------|
| Fe | 1.301087  | 0.017662  | -0.117634 |
| Fe | -1.299665 | -0.018561 | 0.116518  |
| O  | 0.070429  | -1.271049 | -0.019389 |
| O  | -0.068819 | 1.270082  | 0.017688  |
| O  | 2.429294  | 0.490564  | -6.108471 |
| N  | 2.728564  | 1.476861  | -0.224621 |
| C  | 2.371069  | 2.265834  | -1.441875 |
| H  | 3.172973  | 2.969565  | -1.701145 |
| H  | 1.470510  | 2.849525  | -1.202271 |
| N  | 1.435085  | 0.167031  | -2.110720 |
| C  | 2.064721  | 1.288711  | -2.546541 |
| N  | 1.772289  | 0.131871  | 1.820459  |
| C  | 2.408530  | 1.475413  | -3.892987 |
| N  | 2.873393  | -1.208791 | -0.261272 |
| C  | 2.072526  | 0.434100  | -4.789251 |
| C  | 1.465580  | -0.752170 | -4.331017 |
| C  | 1.164647  | -0.827607 | -2.973168 |
| H  | 0.686632  | -1.710566 | -2.548244 |
| C  | 3.160468  | 2.693277  | -4.358906 |
| H  | 3.911988  | 3.005945  | -3.622509 |
| H  | 2.489539  | 3.551093  | -4.518361 |
| H  | 3.679137  | 2.485661  | -5.301954 |
| C  | 1.693803  | 1.418819  | -6.946246 |
| H  | 2.199556  | 1.410088  | -7.917073 |
| H  | 1.703737  | 2.435982  | -6.532546 |
| H  | 0.656190  | 1.074256  | -7.065156 |
| C  | 1.174910  | -1.896720 | -5.258593 |
| H  | 0.668793  | -2.711760 | -4.726909 |
| H  | 2.105848  | -2.291762 | -5.690855 |
| H  | 0.542840  | -1.581463 | -6.100595 |
| C  | 2.570094  | 2.255842  | 1.041236  |
| H  | 1.652807  | 2.854619  | 0.947422  |
| H  | 3.415256  | 2.942605  | 1.187116  |
| C  | 2.430375  | 1.265439  | 2.167505  |
| C  | 2.948595  | 1.460421  | 3.453627  |
| C  | 2.158168  | -0.799227 | 4.003539  |
| C  | 3.637189  | 2.744430  | 3.831565  |
| H  | 2.999291  | 3.614904  | 3.623161  |
| H  | 4.569298  | 2.877397  | 3.261381  |
| H  | 3.885370  | 2.747197  | 4.897721  |
| C  | 4.518099  | -0.103371 | 5.974616  |
| H  | 4.703642  | 0.111590  | 7.031931  |
| H  | 5.336221  | 0.298907  | 5.359449  |
| H  | 4.439250  | -1.188670 | 5.824069  |
| C  | 1.983930  | -1.951654 | 4.951589  |
| H  | 1.135596  | -2.578938 | 4.650604  |
| H  | 1.823216  | -1.597451 | 5.978309  |
| H  | 2.876295  | -2.595963 | 4.963901  |
| C  | 4.104978  | 0.880503  | -0.337577 |
| H  | 4.722632  | 1.239702  | 0.499300  |
| H  | 4.590841  | 1.265643  | -1.246748 |
| C  | 4.084437  | -0.625550 | -0.356824 |
| C  | 5.266083  | -1.373010 | -0.462903 |
| C  | 5.144202  | -2.777223 | -0.454771 |

|   |           |           |           |
|---|-----------|-----------|-----------|
| C | 3.876509  | -3.393540 | -0.368965 |
| C | 2.771179  | -2.551699 | -0.273703 |
| H | 1.757212  | -2.949497 | -0.213495 |
| C | 6.599235  | -0.688597 | -0.579796 |
| H | 6.633527  | -0.037955 | -1.467238 |
| H | 7.406548  | -1.422687 | -0.664653 |
| H | 6.797313  | -0.052137 | 0.296204  |
| C | 6.766007  | -4.207495 | 0.566099  |
| H | 7.635486  | -4.787872 | 0.240514  |
| H | 6.007061  | -4.880773 | 0.987489  |
| H | 7.068955  | -3.469228 | 1.323165  |
| C | 3.692582  | -4.884300 | -0.420022 |
| H | 2.675083  | -5.135327 | -0.745185 |
| H | 3.845645  | -5.342984 | 0.568799  |
| H | 4.410626  | -5.343631 | -1.112518 |
| C | 2.814025  | 0.394987  | 4.371072  |
| C | 1.646260  | -0.867914 | 2.709086  |
| H | 1.108387  | -1.750189 | 2.361178  |
| O | 3.272980  | 0.568398  | 5.648947  |
| O | 6.275831  | -3.531771 | -0.620584 |
| O | -2.430612 | -0.489758 | 6.106906  |
| N | -2.727300 | -1.477397 | 0.223622  |
| C | -2.369568 | -2.266521 | 1.440718  |
| H | -3.170978 | -2.970966 | 1.699543  |
| H | -1.468439 | -2.849346 | 1.201131  |
| N | -1.433823 | -0.167850 | 2.109704  |
| C | -2.064002 | -1.289263 | 2.545484  |
| N | -1.771309 | -0.132495 | -1.821515 |
| C | -2.408595 | -1.475555 | 3.891774  |
| N | -2.871532 | 1.208372  | 0.260474  |
| C | -2.073121 | -0.433920 | 4.787923  |
| C | -1.466089 | 0.752275  | 4.329588  |
| C | -1.164186 | 0.827203  | 2.971927  |
| H | -0.686439 | 1.710288  | 2.546971  |
| C | -3.160926 | -2.693169 | 4.357721  |
| H | -3.910362 | -3.007565 | 3.619961  |
| H | -2.489949 | -3.550333 | 4.520442  |
| H | -3.682108 | -2.484244 | 5.299113  |
| C | -1.697124 | -1.418902 | 6.945458  |
| H | -2.204809 | -1.410762 | 7.915278  |
| H | -1.706489 | -2.435748 | 6.531028  |
| H | -0.659670 | -1.074657 | 7.066659  |
| C | -1.176066 | 1.897166  | 5.256940  |
| H | -0.670185 | 2.712270  | 4.725134  |
| H | -2.107233 | 2.291927  | 5.688958  |
| H | -0.544079 | 1.582309  | 6.099166  |
| C | -2.569455 | -2.256349 | -1.042351 |
| H | -1.652373 | -2.855466 | -0.948774 |
| H | -3.414918 | -2.942765 | -1.188058 |
| C | -2.429912 | -1.265794 | -2.168509 |
| C | -2.949180 | -1.460144 | -3.454280 |
| C | -2.158810 | 0.799598  | -4.003890 |
| C | -3.638515 | -2.743784 | -3.832201 |
| H | -3.001828 | -3.614747 | -3.622222 |
| H | -4.571616 | -2.875338 | -3.263275 |
| H | -3.885179 | -2.747087 | -4.898717 |
| C | -4.520750 | 0.105842  | -5.972961 |

|   |           |           |           |
|---|-----------|-----------|-----------|
| H | -4.708753 | -0.110698 | -7.029518 |
| H | -5.338117 | -0.294292 | -5.355409 |
| H | -4.440169 | 1.191304  | -5.824496 |
| C | -1.985423 | 1.952546  | -4.951465 |
| H | -1.136083 | 2.579026  | -4.651638 |
| H | -1.826912 | 1.598920  | -5.978722 |
| H | -2.877322 | 2.597544  | -4.961634 |
| C | -4.103553 | -0.880723 | 0.337106  |
| H | -4.721383 | -1.239295 | -0.499920 |
| H | -4.589492 | -1.266279 | 1.246074  |
| C | -4.082596 | 0.625322  | 0.357047  |
| C | -5.264036 | 1.372983  | 0.464480  |
| C | -5.141858 | 2.777139  | 0.456815  |
| C | -3.874179 | 3.393209  | 0.369834  |
| C | -2.769049 | 2.551248  | 0.273250  |
| H | -1.755043 | 2.948887  | 0.212680  |
| C | -6.597084 | 0.688628  | 0.582786  |
| H | -6.631193 | 0.039796  | 1.471569  |
| H | -7.404539 | 1.422734  | 0.666231  |
| H | -6.795066 | 0.050388  | -0.291932 |
| C | -6.766193 | 4.205386  | -0.562541 |
| H | -7.633114 | 4.788717  | -0.235417 |
| H | -6.007306 | 4.875603  | -0.988922 |
| H | -7.073750 | 3.465500  | -1.316177 |
| C | -3.690222 | 4.883961  | 0.420512  |
| H | -2.671503 | 5.135064  | 0.741731  |
| H | -3.847363 | 5.342978  | -0.567509 |
| H | -4.405684 | 5.342950  | 1.115920  |
| C | -2.815322 | -0.394280 | -4.371363 |
| C | -1.645765 | 0.867609  | -2.709849 |
| H | -1.107648 | 1.749732  | -2.361928 |
| O | -3.275831 | -0.566998 | -5.648742 |
| O | -6.272888 | 3.532243  | 0.624303  |

### Optimized xyz Coordinates for 90° Mono- $\mu$ -oxo Model:

|    |           |           |           |
|----|-----------|-----------|-----------|
| Fe | 0.000000  | -0.000000 | 1.308100  |
| Fe | 0.000000  | 0.000000  | -1.308100 |
| O  | -0.000000 | 1.308100  | -0.000000 |
| N  | 0.881298  | -1.738775 | 2.002017  |
| N  | -1.726371 | -0.608715 | 2.293155  |
| N  | 0.537496  | 0.881645  | 3.124900  |
| N  | -0.001769 | 0.837437  | -3.218402 |
| N  | 1.420737  | -1.335264 | -2.002400 |
| N  | -1.440168 | -1.316312 | -2.017962 |
| H  | 1.568922  | -2.187811 | 1.390921  |
| C  | -0.294408 | -2.663407 | 2.157568  |
| C  | -1.455235 | -1.972256 | 2.868670  |
| H  | -2.555350 | -0.641171 | 1.691943  |
| C  | -1.911662 | 0.483799  | 3.307860  |
| C  | -0.612681 | 0.734070  | 4.071656  |
| H  | 0.753703  | 1.870286  | 2.961033  |
| C  | 1.786260  | 0.124186  | 3.429720  |
| C  | 1.563355  | -1.380632 | 3.307498  |
| H  | 0.177662  | 1.844551  | -3.150409 |
| C  | 1.081214  | 0.149568  | -3.991448 |
| C  | 2.100144  | -0.497626 | -3.054864 |
| H  | 2.135347  | -1.630546 | -1.330670 |
| C  | 0.682710  | -2.541355 | -2.528863 |
| C  | -0.731388 | -2.636157 | -1.957900 |
| H  | -2.290904 | -1.365826 | -1.449875 |
| C  | -1.805577 | -0.863179 | -3.413180 |
| C  | -1.409289 | 0.591664  | -3.648543 |
| H  | -0.590894 | -2.991817 | 1.151612  |
| H  | 0.008253  | -3.561530 | 2.714364  |
| H  | -1.249811 | -1.858444 | 3.938605  |
| H  | -2.355930 | -2.589940 | 2.772926  |
| H  | -2.224935 | 1.379336  | 2.756689  |
| H  | -2.716587 | 0.211946  | 4.005726  |
| H  | -0.385292 | -0.084503 | 4.763941  |
| H  | -0.708452 | 1.652151  | 4.664185  |
| H  | 2.137652  | 0.371239  | 4.443584  |
| H  | 2.548143  | 0.468870  | 2.717853  |
| H  | 2.528748  | -1.896277 | 3.354685  |
| H  | 0.943133  | -1.762441 | 4.126457  |
| H  | 0.615189  | -0.588668 | -4.653557 |
| H  | 1.591486  | 0.886578  | -4.623757 |
| H  | 2.685463  | 0.262774  | -2.523191 |
| H  | 2.795829  | -1.124265 | -3.631096 |
| H  | 1.241348  | -3.447318 | -2.269927 |
| H  | 0.660745  | -2.475039 | -3.622121 |
| H  | -0.717735 | -2.946221 | -0.903359 |
| H  | -1.304762 | -3.399245 | -2.503682 |
| H  | -2.886961 | -0.973917 | -3.550905 |
| H  | -1.311303 | -1.533898 | -4.125492 |
| H  | -1.524834 | 0.847052  | -4.713247 |
| H  | -2.042980 | 1.273666  | -3.067317 |

### Optimized xyz Coordinates for 120° Mono- $\mu$ -oxo Model:

|    |                    |                   |                   |
|----|--------------------|-------------------|-------------------|
| Fe | 0.92500001441428   | 1.60215006349232  | -0.00000000000000 |
| Fe | -1.849999994004900 | 0.00000001628546  | -0.00000000000000 |
| O  | -0.00000007760534  | -0.00000007737634 | 0.00000000000000  |
| N  | 2.64521214774086   | 1.86213077842761  | 1.12350351522232  |
| N  | 0.43422719025687   | 3.55717214591408  | 0.45470330878733  |
| N  | 2.00910178781675   | 2.35519533738272  | -1.59643943898847 |
| H  | 2.92163296302792   | 1.00124706283526  | 1.60472684099086  |
| C  | 2.17570859414279   | 2.86822149760360  | 2.12935030848044  |
| C  | 1.46815687697764   | 4.03706022549891  | 1.44571795815104  |
| H  | -0.49926716430683  | 3.69258575140719  | 0.85395506560011  |
| C  | 0.48647052460003   | 4.21874693857416  | -0.89319715359458 |
| C  | 1.76125922461858   | 3.83774490325860  | -1.64444511657211 |
| H  | 1.73949841510357   | 1.92239299354798  | -2.48474731287541 |
| C  | 3.41004120258512   | 1.94679512131075  | -1.25142203370294 |
| C  | 3.73777386644858   | 2.31419439034347  | 0.19488846110802  |
| H  | 1.49543740510252   | 2.34104736651601  | 2.81150308350737  |
| H  | 3.02632517091227   | 3.24000135892675  | 2.71966582560615  |
| H  | 2.17926721509360   | 4.67414774707385  | 0.90778500852911  |
| H  | 0.97602024943769   | 4.65822870231272  | 2.20262449199486  |
| H  | -0.40709813510086  | 3.89342200788638  | -1.44245144329136 |
| H  | 0.42948632712690   | 5.31066800263578  | -0.77762109752116 |
| H  | 2.63548050665796   | 4.34393414083400  | -1.21884454673260 |
| H  | 1.67510627293293   | 4.15682782342012  | -2.68976873236093 |
| H  | 4.12329767140913   | 2.42725548358751  | -1.93700844971052 |
| H  | 3.47027868183906   | 0.86133414935738  | -1.40330417002858 |
| H  | 4.68152873117141   | 1.84027930141205  | 0.48924183018604  |
| H  | 3.86341092233773   | 3.39699882404751  | 0.31388062487146  |
| N  | -2.90324054585431  | -1.49150334874196 | -0.97584049068269 |
| N  | -3.30812925000676  | 1.32429297640312  | -0.62739039298799 |
| N  | -3.06470804121382  | -0.38752579789421 | 1.63401135040270  |
| H  | -2.28068448643306  | -2.20100657929132 | -1.37356725614363 |
| C  | -3.54089265967315  | -0.70847062769160 | -2.08263217566575 |
| C  | -4.22522745832581  | 0.54521706635682  | -1.53989418956762 |
| H  | -2.96150633674252  | 2.14891474477946  | -1.12673592499831 |
| C  | -3.92159497298081  | 1.76154857398414  | 0.67164159339544  |
| C  | -4.23050680767507  | 0.56024757211978  | 1.56413786542236  |
| H  | -2.56683779074863  | -0.26690956496639 | 2.52110846821909  |
| C  | -3.39548131820141  | -1.83853249189086 | 1.44967747844390  |
| C  | -3.84472052614898  | -2.11710352056402 | 0.01555613992262  |
| H  | -2.74165750539722  | -0.44626984656476 | -2.78871586559359 |
| H  | -4.27273504045344  | -1.33368261391038 | -2.61542253301608 |
| H  | -5.12678601728549  | 0.29003585414749  | -0.97107022118270 |
| H  | -4.53042241893328  | 1.18659608330627  | -2.37451364563600 |
| H  | -3.20085217077896  | 2.43585595714557  | 1.15345832310629  |
| H  | -4.83951833977623  | 2.33600104389730  | 0.48090856313748  |
| H  | -5.09966277328671  | 0.00691504958457  | 1.19178597061041  |
| H  | -4.47353048648845  | 0.91076995320534  | 2.57400471111247  |
| H  | -4.18016066056827  | -2.14016644731908 | 2.15875597503320  |
| H  | -2.48458062971692  | -2.40164454884270 | 1.69029504516941  |
| H  | -3.88005705393942  | -3.19970606246369 | -0.15327784666505 |
| H  | -4.84946604671025  | -1.72167011147195 | -0.17427946211793 |

### Optimized xyz Coordinates for 150° Mono- $\mu$ -oxo Model:

|    |                   |                   |                   |
|----|-------------------|-------------------|-------------------|
| Fe | 1.60214995368452  | 0.92499995602940  | 0.00000000000000  |
| Fe | -1.85000006433787 | -0.00000001194443 | 0.00000000000000  |
| O  | 0.00000011186642  | 0.00000005386333  | -0.00000000000000 |
| N  | 2.91171317826354  | 1.01925096139329  | 1.60644917908247  |
| N  | 2.09580427497598  | 2.89574193194068  | -0.37135930333668 |
| N  | 3.25075694420037  | 0.40697532543340  | -1.14495208403127 |
| H  | 2.59622190892498  | 0.44449579648285  | 2.39338968488952  |
| C  | 2.82637587123065  | 2.46629206735756  | 1.98534720803810  |
| C  | 2.97888817962876  | 3.36186677148263  | 0.75570386117207  |
| H  | 1.27673952181175  | 3.50588544657671  | -0.44823465015773 |
| C  | 2.75748752304113  | 2.79480649760386  | -1.71452822010182 |
| C  | 3.80292963970639  | 1.67957251852535  | -1.72727332426210 |
| H  | 3.00824122957982  | -0.24782068394266 | -1.89433477956629 |
| C  | 4.12700655976721  | -0.28611563526021 | -0.14565780802354 |
| C  | 4.25795271971760  | 0.54704445047132  | 1.12862519759745  |
| H  | 1.84532851082167  | 2.61191884791591  | 2.45699873805308  |
| H  | 3.59916090592065  | 2.71126102852337  | 2.72882204362323  |
| H  | 4.01353668119437  | 3.36715243148454  | 0.39383524713231  |
| H  | 2.71625533617128  | 4.39293566568433  | 1.01912208794385  |
| H  | 1.96076817715819  | 2.59417948693452  | -2.44327444590413 |
| H  | 3.22513922930106  | 3.75426442090311  | -1.97970918653736 |
| H  | 4.69118777427828  | 1.96229567076427  | -1.15053663782913 |
| H  | 4.12632954200119  | 1.49536173383566  | -2.75848596601685 |
| H  | 5.12026181122065  | -0.47631166082539 | -0.57823183538389 |
| H  | 3.65727709266018  | -1.25538253210978 | 0.06680445756719  |
| H  | 4.73260377577636  | -0.05223693447671 | 1.91431129693082  |
| H  | 4.88762358723784  | 1.42890125990494  | 0.96181565488991  |
| N  | -3.04602046315678 | -0.82298656310725 | -1.47963782606514 |
| N  | -3.24974406091821 | 1.51448850765011  | 0.13009463227712  |
| N  | -3.01941689840935 | -1.04680075354486 | 1.35388659452258  |
| H  | -2.49330302511263 | -1.29630346845586 | -2.20048866160298 |
| C  | -3.68538737056258 | 0.39767110702707  | -2.06824411517703 |
| C  | -4.25385580669643 | 1.29750246559176  | -0.97139705528400 |
| H  | -2.83554695876632 | 2.44723085586398  | 0.04328333767196  |
| C  | -3.76729270363388 | 1.33756753863216  | 1.52720876788279  |
| C  | -4.12096614881374 | -0.12500812278342 | 1.80083921411145  |
| H  | -2.47748576720584 | -1.36728919223521 | 2.16178662478119  |
| C  | -3.45071227286300 | -2.23344493586261 | 0.54584025473441  |
| C  | -3.98171649602115 | -1.79867014509395 | -0.81975554255816 |
| H  | -2.90463541113646 | 0.91957433583266  | -2.63756198660550 |
| H  | -4.48147792500301 | 0.10922822229815  | -2.77048041244500 |
| H  | -5.15693349786847 | 0.86328049552948  | -0.52723623091966 |
| H  | -4.53337892520046 | 2.26636141106839  | -1.40136105285379 |
| H  | -2.97237324939247 | 1.68055314842587  | 2.20265507491018  |
| H  | -4.64841196295057 | 1.97561308949878  | 1.68839757745762  |
| H  | -5.04100260747142 | -0.41644471163345 | 1.28147279719667  |
| H  | -4.29388077848257 | -0.26188260554090 | 2.87475076612547  |
| H  | -4.22040819422760 | -2.80268310671485 | 1.08739643469510  |
| H  | -2.56758299061563 | -2.87606517795385 | 0.43513065454276  |
| H  | -4.09972551662503 | -2.67846481392486 | -1.46316367449955 |
| H  | -4.96569198294477 | -1.32323834147254 | -0.73265202320772 |

### Optimized xyz Coordinates for 180° Mono- $\mu$ -oxo Model:

|    |           |           |           |
|----|-----------|-----------|-----------|
| Fe | -0.000000 | -0.000000 | 1.850000  |
| Fe | -0.000000 | -0.000000 | -1.850000 |
| O  | 0.000000  | 0.000000  | 0.000000  |
| N  | -0.790352 | -1.421909 | 3.131232  |
| N  | -0.872123 | 1.420160  | 3.082425  |
| N  | 1.632104  | 0.071391  | 3.123000  |
| N  | -0.171877 | 1.682630  | -3.050888 |
| N  | 1.498163  | -0.615765 | -3.139289 |
| N  | -1.333249 | -0.911897 | -3.144570 |
| H  | -1.063374 | -2.276150 | 2.636111  |
| C  | -2.019388 | -0.732796 | 3.642640  |
| C  | -1.694053 | 0.687264  | 4.107445  |
| H  | -1.462504 | 2.073016  | 2.558658  |
| C  | 0.325817  | 2.150790  | 3.610408  |
| C  | 1.380888  | 1.168944  | 4.121304  |
| H  | 2.506737  | 0.245911  | 2.619176  |
| C  | 1.650674  | -1.320802 | 3.679059  |
| C  | 0.259815  | -1.733975 | 4.162488  |
| H  | -0.101536 | 2.549893  | -2.510479 |
| C  | 0.926111  | 1.621965  | -4.077574 |
| C  | 2.051314  | 0.689515  | -3.627327 |
| H  | 2.235355  | -1.134562 | -2.652626 |
| C  | 0.859321  | -1.484768 | -4.188882 |
| C  | -0.496762 | -2.014857 | -3.720693 |
| H  | -2.134465 | -1.318190 | -2.652275 |
| C  | -1.803271 | 0.131248  | -4.122270 |
| C  | -1.566571 | 1.541581  | -3.581268 |
| H  | -2.740624 | -0.717956 | 2.814821  |
| H  | -2.461675 | -1.308342 | 4.468926  |
| H  | -1.133999 | 0.677612  | 5.049742  |
| H  | -2.625686 | 1.236896  | 4.285377  |
| H  | 0.720328  | 2.751640  | 2.780347  |
| H  | 0.027771  | 2.837816  | 4.415885  |
| H  | 1.068683  | 0.706400  | 5.064783  |
| H  | 2.317319  | 1.705342  | 4.313607  |
| H  | 2.373221  | -1.390384 | 4.505344  |
| H  | 1.995184  | -1.979011 | 2.870489  |
| H  | 0.250912  | -2.809443 | 4.374508  |
| H  | -0.008413 | -1.215009 | 5.090162  |
| H  | 0.488213  | 1.286485  | -5.024940 |
| H  | 1.327436  | 2.629129  | -4.240127 |
| H  | 2.612056  | 1.127724  | -2.791230 |
| H  | 2.754017  | 0.518024  | -4.455844 |
| H  | 1.522798  | -2.327652 | -4.414754 |
| H  | 0.757976  | -0.892287 | -5.105612 |
| H  | -0.371372 | -2.763233 | -2.926996 |
| H  | -1.024015 | -2.493588 | -4.558835 |
| H  | -2.872516 | -0.010542 | -4.317855 |
| H  | -1.273533 | -0.025242 | -5.069185 |
| H  | -1.750168 | 2.284869  | -4.370970 |
| H  | -2.245660 | 1.759205  | -2.746283 |



### Optimized xyz Coordinates for 90° Bis- $\mu$ -oxo Model:

|    |           |           |           |
|----|-----------|-----------|-----------|
| Fe | -0.000000 | 0.000000  | 1.308100  |
| Fe | -0.000000 | 0.000000  | -1.308100 |
| O  | 0.000000  | 1.308100  | 0.000000  |
| O  | 0.000000  | -1.308100 | 0.000000  |
| N  | -0.172546 | -1.587285 | 2.932755  |
| N  | -1.338393 | 0.952704  | 2.730728  |
| N  | 1.534260  | 0.617752  | 2.688744  |
| N  | 1.270999  | 1.027199  | -2.751186 |
| N  | 0.269004  | -1.576980 | -2.925713 |
| N  | -1.575978 | 0.520514  | -2.674916 |
| H  | -0.106502 | -2.479902 | 2.441261  |
| C  | -1.539278 | -1.416957 | 3.472471  |
| C  | -1.789436 | 0.049578  | 3.830911  |
| H  | -2.151799 | 1.337806  | 2.246035  |
| C  | -0.466644 | 2.086222  | 3.159070  |
| C  | 0.908171  | 1.601260  | 3.633897  |
| H  | 2.291570  | 1.076224  | 2.177243  |
| C  | 2.071935  | -0.608002 | 3.342089  |
| C  | 0.932554  | -1.457115 | 3.914513  |
| H  | 2.060950  | 1.463674  | -2.271415 |
| C  | 1.770445  | 0.151793  | -3.851430 |
| C  | 1.615388  | -1.326563 | -3.484994 |
| H  | 0.263663  | -2.469630 | -2.429566 |
| C  | -0.854392 | -1.520737 | -3.894801 |
| C  | -2.038951 | -0.744623 | -3.311982 |
| H  | -2.358018 | 0.935173  | -2.163120 |
| C  | -1.020042 | 1.532919  | -3.633653 |
| C  | 0.327243  | 2.103086  | -3.174777 |
| H  | -2.236644 | -1.734036 | 2.683950  |
| H  | -1.722929 | -2.049821 | 4.357212  |
| H  | -1.247872 | 0.319649  | 4.747230  |
| H  | -2.856934 | 0.204682  | 4.034883  |
| H  | -0.357339 | 2.744199  | 2.286789  |
| H  | -0.939800 | 2.665644  | 3.968441  |
| H  | 0.827565  | 1.125180  | 4.619195  |
| H  | 1.566585  | 2.471366  | 3.755232  |
| H  | 2.787018  | -0.352499 | 4.140549  |
| H  | 2.615976  | -1.166732 | 2.567763  |
| H  | 1.325888  | -2.442629 | 4.201967  |
| H  | 0.536689  | -0.999065 | 4.830679  |
| H  | 1.207513  | 0.383691  | -4.765446 |
| H  | 2.825098  | 0.372034  | -4.062737 |
| H  | 2.341625  | -1.597246 | -2.705086 |
| H  | 1.824281  | -1.951654 | -4.369548 |
| H  | -1.186718 | -2.530256 | -4.175212 |
| H  | -0.499044 | -1.040718 | -4.816146 |
| H  | -2.533200 | -1.332639 | -2.526284 |
| H  | -2.780672 | -0.543333 | -4.101636 |
| H  | -1.731213 | 2.360569  | -3.754102 |
| H  | -0.920291 | 1.055633  | -4.616602 |
| H  | 0.755366  | 2.707891  | -3.990651 |
| H  | 0.186278  | 2.756259  | -2.303412 |
